# Supplementary material for: Green synthesis of fluorescent copper nanoclusters stabilized by epigallocatechin gallate and their applications as a novel troxerutin (trihydroxyethylrutin) and temperature sensor
Source: Royal Society of Chemistry journal article supplement (doi:10.1039/d3nj01749d), 2023-01-01
Supplement: d3nj01749d1.pdf [file d3nj01749d1.pdf]

## Supplementary Information

### Green synthesis of fluorescent copper nanoclusters stabilized by epigallocatechin gallate and their applications as novel troxerutin (trihydroxyethylrutin) and a smart sensor

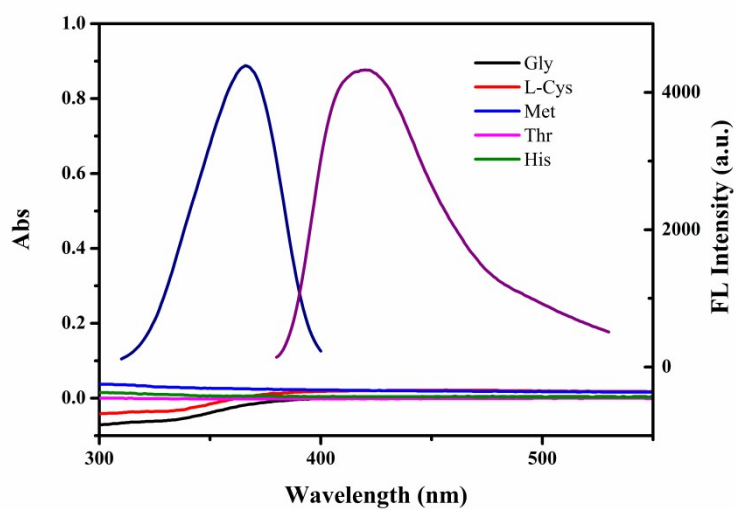

**Fig. S1** UV-Vis spectra of amino acids and the fluorescence excitation and emission spectra of EGCG-Cu NCs.(amino acids: glycine, L-cysteine, methionine, threonine, histidine) .
